# Supplementary material
Source: MDPI journal article supplement (https://www.mdpi.com/2075-163X/11/2/215)
Supplement: s1 [file s1]

## Supplementary Material

A cylindrical, custom-designed, constant volume pressure vessel with internal dimensions of 60 mm (diameter) and 116 mm (length) was used to conduct the laboratory experimentation (Figure S1A). The pressure vessel was constructed from 316-stainless steel and thus maintained a constant volume throughout the test duration, mimicking the unyielding host-rock wall of the KBS3 disposal concept [SKB (1983), Harrington and Tamayo-Mas (2016), Harrington *et al.* (2017)]. The pressure vessel was oriented horizontally and instrumented with 5 load cells (3 radial and 2 axial) to measure the stress distribution in the sample and 12 radial pore pressure transducers (Figure S1B). Tungsten carbide pushrods running from the internal face of the vessel to the outer rim translated the stress from the clay sample to the load cells. The load cells were contained in a stainless steel housing on the outside of the vessel. As a result of the indirect nature of the pushrod and load cell measurements, the quoted pressures can be considered accurate to  $\pm 80$  kPa. The pore pressure transducers were configured in three planar arrays of 4 sensors, each separated at 90 degrees around the bore of the vessel. They were also sited behind porous plugs that prevented the sample from extruding out into the recess created for the instrumentation. Two sintered metal filters recessed into the two end closures of the vessel supplied the test fluid evenly to each end of the sample. At the left-hand end of the vessel, the clay was located directly on the pushrod connected to the sensor and there was water available to the clay, supplied evenly through the sintered metal filter recessed into the end-closure. A matching sintered filter recessed into the end-closure at the opposite end of the vessel (right-hand end) allowed the pore pressure to be applied to the void space.

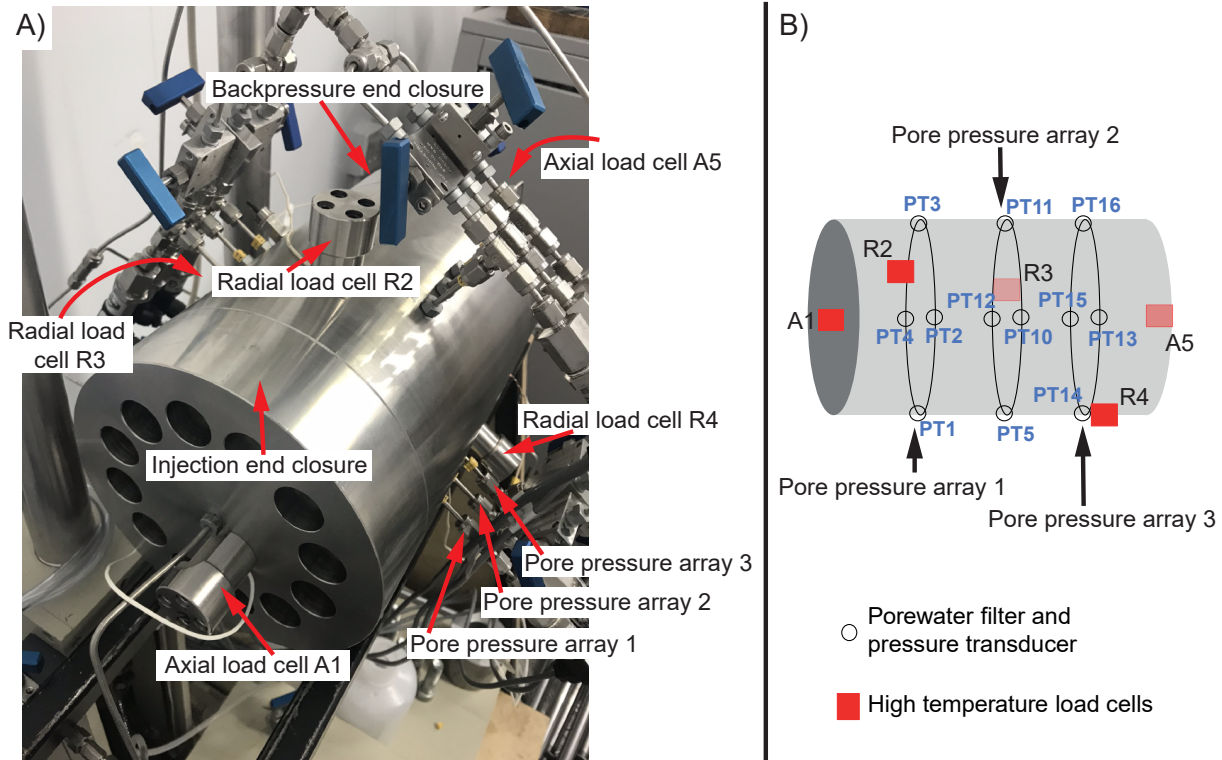

**Figure S1:** Experimental apparatus with (A) cylindrical, custom-designed pressure vessel, and (B) the location of the instruments with respect to the inner surface of the test vessel.

| Analysis         |                    | Weight % Element                                                                                                             |      |      |       |       |      |      |      |      |      |      |      |       |        |
|------------------|--------------------|------------------------------------------------------------------------------------------------------------------------------|------|------|-------|-------|------|------|------|------|------|------|------|-------|--------|
| No.              |                    | [Total Fe determined as Fe <sup>3+</sup> ; O calculated from element-oxide stoichiometry; concentrations normalised to 100%] |      |      |       |       |      |      |      |      |      |      |      |       |        |
|                  |                    | Na                                                                                                                           | Mg   | Al   | Si    | P     | S    | K    | Ca   | Ti   | Mn   | Fe   | O    | Total |        |
| Slice 1 piece AA | (Gel)              | 1                                                                                                                            | 1.14 | 2.95 | 9.89  | 31.05 | 0.00 | 0.20 | 0.92 | 1.05 | 0.33 | 0.00 | 3.39 | 49.09 | 100.00 |
|                  |                    | 2                                                                                                                            | 1.03 | 2.88 | 9.86  | 30.92 | 0.00 | 0.26 | 0.91 | 1.14 | 0.35 | 0.00 | 3.60 | 49.06 | 100.00 |
|                  |                    | 3                                                                                                                            | 1.10 | 2.86 | 10.07 | 31.06 | 0.00 | 0.20 | 0.92 | 1.06 | 0.30 | 0.00 | 3.29 | 49.14 | 100.00 |
|                  |                    | 4                                                                                                                            | 0.65 | 2.44 | 9.24  | 30.25 | 0.00 | 0.24 | 1.16 | 1.37 | 0.39 | 0.00 | 5.84 | 48.42 | 100.00 |
|                  |                    | 5                                                                                                                            | 0.62 | 2.52 | 9.40  | 30.62 | 0.21 | 0.11 | 1.13 | 1.45 | 0.36 | 0.00 | 4.88 | 48.70 | 100.00 |
|                  |                    | 6                                                                                                                            | 0.96 | 2.82 | 9.95  | 31.16 | 0.00 | 0.14 | 0.99 | 0.98 | 0.30 | 0.08 | 3.55 | 49.08 | 100.00 |
|                  |                    | 7                                                                                                                            | 0.95 | 2.89 | 9.83  | 30.86 | 0.00 | 0.29 | 1.13 | 1.21 | 0.33 | 0.06 | 3.44 | 49.00 | 100.00 |
|                  |                    | 8                                                                                                                            | 0.70 | 2.86 | 9.98  | 31.20 | 0.00 | 0.34 | 0.94 | 1.21 | 0.24 | 0.00 | 3.26 | 49.28 | 100.00 |
|                  |                    | 9                                                                                                                            | 0.91 | 2.79 | 9.68  | 31.13 | 0.00 | 0.32 | 0.98 | 1.28 | 0.35 | 0.00 | 3.44 | 49.12 | 100.00 |
|                  |                    | 10                                                                                                                           | 0.98 | 2.85 | 9.68  | 31.44 | 0.00 | 0.14 | 0.87 | 1.05 | 0.37 | 0.00 | 3.45 | 49.18 | 100.00 |
|                  |                    | 11                                                                                                                           | 0.93 | 2.92 | 9.81  | 31.22 | 0.00 | 0.23 | 0.97 | 1.25 | 0.28 | 0.02 | 3.22 | 49.15 | 100.00 |
|                  |                    | 12                                                                                                                           | 0.99 | 2.85 | 9.72  | 30.82 | 0.00 | 0.31 | 1.01 | 1.19 | 0.48 | 0.08 | 3.55 | 49.00 | 100.00 |
|                  |                    | 13                                                                                                                           | 0.84 | 2.71 | 9.57  | 29.99 | 0.00 | 1.09 | 0.89 | 1.93 | 0.17 | 0.00 | 3.74 | 49.07 | 100.00 |
|                  |                    | 14                                                                                                                           | 0.97 | 2.86 | 9.77  | 30.72 | 0.00 | 0.52 | 0.87 | 1.29 | 0.40 | 0.00 | 3.47 | 49.13 | 100.00 |
|                  |                    | 15                                                                                                                           | 0.95 | 2.72 | 9.62  | 31.15 | 0.00 | 0.11 | 0.92 | 1.20 | 0.46 | 0.00 | 3.91 | 48.98 | 100.00 |
|                  |                    | 16                                                                                                                           | 0.74 | 2.63 | 9.51  | 31.25 | 0.00 | 0.17 | 1.15 | 1.02 | 0.35 | 0.00 | 4.20 | 48.99 | 100.00 |
|                  |                    | 17                                                                                                                           | 1.08 | 2.60 | 9.75  | 31.31 | 0.00 | 0.17 | 0.86 | 1.33 | 0.30 | 0.00 | 3.48 | 49.10 | 100.00 |
|                  |                    | 18                                                                                                                           | 0.89 | 2.79 | 9.62  | 31.10 | 0.00 | 0.24 | 1.09 | 1.04 | 0.35 | 0.00 | 3.86 | 49.02 | 100.00 |
|                  |                    | 19                                                                                                                           | 1.09 | 3.24 | 9.49  | 30.89 | 0.00 | 0.12 | 1.01 | 1.22 | 0.32 | 0.10 | 3.67 | 48.84 | 100.00 |
|                  |                    | 20                                                                                                                           | 0.86 | 2.92 | 9.64  | 31.44 | 0.00 | 0.30 | 0.92 | 0.93 | 0.22 | 0.09 | 3.41 | 49.26 | 100.00 |
|                  |                    | 21                                                                                                                           | 0.63 | 2.32 | 9.01  | 31.29 | 0.00 | 0.26 | 1.59 | 1.20 | 0.37 | 0.00 | 4.52 | 48.80 | 100.00 |
|                  |                    | 22                                                                                                                           | 0.51 | 2.33 | 8.71  | 30.55 | 0.00 | 0.54 | 1.55 | 1.55 | 0.70 | 0.00 | 4.97 | 48.60 | 100.00 |
|                  |                    | 23                                                                                                                           | 0.45 | 2.05 | 8.46  | 30.25 | 0.00 | 0.81 | 1.76 | 2.07 | 0.59 | 0.00 | 5.10 | 48.47 | 100.00 |
|                  |                    | 24                                                                                                                           | 0.61 | 2.62 | 9.29  | 30.83 | 0.00 | 0.37 | 1.45 | 1.46 | 0.37 | 0.00 | 4.19 | 48.81 | 100.00 |
|                  |                    | 25                                                                                                                           | 0.98 | 2.45 | 9.61  | 30.82 | 0.16 | 0.40 | 2.01 | 1.45 | 0.25 | 0.00 | 3.00 | 48.87 | 100.00 |
| Gel              | substrate          | 26                                                                                                                           | 0.61 | 1.87 | 7.30  | 33.86 | 0.00 | 0.55 | 1.89 | 1.33 | 0.30 | 0.00 | 2.69 | 49.61 | 100.00 |
|                  |                    | 27                                                                                                                           | 0.80 | 2.43 | 9.63  | 31.31 | 0.00 | 0.22 | 1.18 | 1.17 | 0.23 | 0.00 | 3.99 | 49.03 | 100.00 |
|                  |                    | 28                                                                                                                           | 0.87 | 2.63 | 9.36  | 30.96 | 0.00 | 0.27 | 1.34 | 1.23 | 0.50 | 0.00 | 4.00 | 48.85 | 100.00 |
|                  |                    | 29                                                                                                                           | 1.02 | 2.61 | 9.33  | 30.63 | 0.44 | 0.14 | 1.20 | 1.79 | 0.33 | 0.00 | 3.69 | 48.82 | 100.00 |
| Slice 2 piece BB | (Bentonite matrix) | 30                                                                                                                           | 0.61 | 3.02 | 9.17  | 32.52 | 0.00 | 0.00 | 0.67 | 0.98 | 0.20 | 0.00 | 3.33 | 49.50 | 100.00 |
|                  |                    | 31                                                                                                                           | 0.57 | 2.67 | 9.05  | 33.05 | 0.00 | 0.00 | 0.97 | 0.80 | 0.15 | 0.00 | 3.11 | 49.62 | 100.00 |
|                  |                    | 32                                                                                                                           | 0.44 | 1.23 | 6.49  | 37.68 | 0.00 | 0.00 | 0.31 | 0.69 | 0.00 | 0.00 | 2.20 | 50.95 | 99.99  |
|                  |                    | 33                                                                                                                           | 0.40 | 1.59 | 9.22  | 33.41 | 0.00 | 0.00 | 0.60 | 1.01 | 0.09 | 0.13 | 3.82 | 49.72 | 100.00 |
|                  |                    | 34                                                                                                                           | 0.25 | 0.98 | 4.25  | 39.43 | 0.00 | 0.00 | 0.53 | 0.82 | 0.08 | 0.00 | 2.60 | 51.05 | 100.00 |
|                  |                    | 35                                                                                                                           | 0.44 | 1.23 | 4.95  | 38.41 | 0.00 | 0.00 | 0.46 | 0.70 | 0.16 | 0.00 | 2.83 | 50.82 | 100.00 |
|                  |                    | 36                                                                                                                           | 0.28 | 0.57 | 2.46  | 42.92 | 0.00 | 0.00 | 0.18 | 0.35 | 0.00 | 0.00 | 1.02 | 52.20 | 100.00 |
|                  |                    | 37                                                                                                                           | 0.37 | 1.65 | 7.65  | 34.25 | 0.00 | 0.00 | 0.92 | 0.87 | 0.22 | 0.00 | 4.43 | 49.63 | 100.00 |
|                  |                    | 38                                                                                                                           | 0.65 | 1.54 | 7.11  | 34.34 | 0.00 | 0.00 | 0.53 | 0.91 | 0.00 | 0.00 | 5.44 | 49.49 | 100.01 |
|                  |                    | 39                                                                                                                           | 0.49 | 1.48 | 6.94  | 37.57 | 0.00 | 0.00 | 0.26 | 0.64 | 0.00 | 0.00 | 1.53 | 51.09 | 100.00 |
|                  |                    | 40                                                                                                                           | 0.57 | 1.58 | 6.52  | 31.97 | 0.00 | 0.00 | 0.94 | 1.22 | 0.31 | 0.00 | 8.80 | 48.11 | 100.00 |

**Table S1:** EDXA analyses of bentonite gel and bentonite substrate (weight % element).

|                  |                    | Analysis |                 | Molar % Ions     |                  |                  |                 |                 |                |                  |                  |                  |                  |                 | Total  |
|------------------|--------------------|----------|-----------------|------------------|------------------|------------------|-----------------|-----------------|----------------|------------------|------------------|------------------|------------------|-----------------|--------|
|                  |                    | No.      | Na <sup>+</sup> | Mg <sup>2+</sup> | Al <sup>3+</sup> | Si <sup>4+</sup> | P <sup>5+</sup> | S <sup>4+</sup> | K <sup>+</sup> | Ca <sup>2+</sup> | Ti <sup>4+</sup> | Mn <sup>2+</sup> | Fe <sup>3+</sup> | O <sup>2-</sup> |        |
| Slice 1 piece AA | (Gel)              | 1        | 1.02            | 2.51             | 7.58             | 22.87            | 0.00            | 0.13            | 0.49           | 0.54             | 0.14             | 0.00             | 1.26             | 63.46           | 100.00 |
|                  |                    | 2        | 0.93            | 2.46             | 7.57             | 22.80            | 0.00            | 0.17            | 0.48           | 0.59             | 0.15             | 0.00             | 1.34             | 63.52           | 100.00 |
|                  |                    | 3        | 0.99            | 2.43             | 7.72             | 22.86            | 0.00            | 0.13            | 0.48           | 0.55             | 0.13             | 0.00             | 1.22             | 63.49           | 100.00 |
|                  |                    | 4        | 0.59            | 2.11             | 7.20             | 22.63            | 0.00            | 0.15            | 0.62           | 0.72             | 0.17             | 0.00             | 2.20             | 63.60           | 100.00 |
|                  |                    | 5        | 0.56            | 2.17             | 7.28             | 22.79            | 0.14            | 0.07            | 0.61           | 0.75             | 0.16             | 0.00             | 1.83             | 63.64           | 100.00 |
|                  |                    | 6        | 0.86            | 2.40             | 7.64             | 22.97            | 0.00            | 0.09            | 0.52           | 0.51             | 0.13             | 0.03             | 1.32             | 63.53           | 100.00 |
|                  |                    | 7        | 0.86            | 2.46             | 7.55             | 22.78            | 0.00            | 0.19            | 0.60           | 0.63             | 0.14             | 0.02             | 1.28             | 63.49           | 100.00 |
|                  |                    | 8        | 0.63            | 2.44             | 7.64             | 22.96            | 0.00            | 0.22            | 0.50           | 0.63             | 0.10             | 0.00             | 1.21             | 63.68           | 100.00 |
|                  |                    | 9        | 0.82            | 2.37             | 7.43             | 22.96            | 0.00            | 0.20            | 0.52           | 0.66             | 0.15             | 0.00             | 1.28             | 63.60           | 100.00 |
|                  |                    | 10       | 0.88            | 2.42             | 7.42             | 23.16            | 0.00            | 0.09            | 0.46           | 0.54             | 0.16             | 0.00             | 1.28             | 63.59           | 100.00 |
|                  |                    | 11       | 0.84            | 2.48             | 7.52             | 22.99            | 0.00            | 0.15            | 0.51           | 0.64             | 0.12             | 0.01             | 1.19             | 63.54           | 100.00 |
|                  |                    | 12       | 0.90            | 2.43             | 7.48             | 22.76            | 0.00            | 0.20            | 0.53           | 0.61             | 0.21             | 0.03             | 1.32             | 63.53           | 100.00 |
|                  |                    | 13       | 0.76            | 2.31             | 7.37             | 22.19            | 0.00            | 0.71            | 0.48           | 1.00             | 0.07             | 0.00             | 1.39             | 63.72           | 100.00 |
|                  |                    | 14       | 0.87            | 2.43             | 7.50             | 22.66            | 0.00            | 0.33            | 0.46           | 0.67             | 0.17             | 0.00             | 1.29             | 63.61           | 100.00 |
|                  |                    | 15       | 0.85            | 2.32             | 7.40             | 23.03            | 0.00            | 0.07            | 0.49           | 0.62             | 0.20             | 0.00             | 1.45             | 63.56           | 100.00 |
|                  |                    | 16       | 0.67            | 2.25             | 7.33             | 23.13            | 0.00            | 0.11            | 0.61           | 0.53             | 0.15             | 0.00             | 1.56             | 63.66           | 100.00 |
|                  |                    | 17       | 0.97            | 2.22             | 7.48             | 23.09            | 0.00            | 0.11            | 0.46           | 0.69             | 0.13             | 0.00             | 1.29             | 63.56           | 100.00 |
|                  |                    | 18       | 0.80            | 2.38             | 7.40             | 22.98            | 0.00            | 0.15            | 0.58           | 0.54             | 0.15             | 0.00             | 1.44             | 63.58           | 100.00 |
|                  |                    | 19       | 0.99            | 2.77             | 7.30             | 22.82            | 0.00            | 0.08            | 0.54           | 0.63             | 0.14             | 0.04             | 1.36             | 63.34           | 100.00 |
|                  |                    | 20       | 0.78            | 2.48             | 7.38             | 23.14            | 0.00            | 0.20            | 0.49           | 0.48             | 0.10             | 0.03             | 1.26             | 63.66           | 100.00 |
|                  |                    | 21       | 0.57            | 1.99             | 6.97             | 23.27            | 0.00            | 0.17            | 0.85           | 0.63             | 0.16             | 0.00             | 1.69             | 63.70           | 100.00 |
|                  |                    | 22       | 0.47            | 2.01             | 6.77             | 22.83            | 0.00            | 0.36            | 0.83           | 0.81             | 0.31             | 0.00             | 1.87             | 63.76           | 100.00 |
|                  |                    | 23       | 0.41            | 1.78             | 6.60             | 22.67            | 0.00            | 0.53            | 0.95           | 1.09             | 0.26             | 0.00             | 1.92             | 63.79           | 100.00 |
|                  |                    | 24       | 0.56            | 2.25             | 7.18             | 22.90            | 0.00            | 0.24            | 0.77           | 0.76             | 0.16             | 0.00             | 1.56             | 63.62           | 100.00 |
|                  |                    | 25       | 0.89            | 2.10             | 7.43             | 22.92            | 0.11            | 0.26            | 1.08           | 0.75             | 0.11             | 0.00             | 1.12             | 63.23           | 100.00 |
| Gel              | substrate          | 26       | 0.55            | 1.59             | 5.60             | 24.94            | 0.00            | 0.36            | 1.00           | 0.69             | 0.13             | 0.00             | 1.00             | 64.16           | 100.00 |
|                  |                    | 27       | 0.72            | 2.08             | 7.41             | 23.16            | 0.00            | 0.15            | 0.63           | 0.60             | 0.10             | 0.00             | 1.49             | 63.66           | 100.00 |
|                  |                    | 28       | 0.79            | 2.25             | 7.22             | 22.94            | 0.00            | 0.18            | 0.71           | 0.64             | 0.22             | 0.00             | 1.49             | 63.56           | 100.00 |
|                  |                    | 29       | 0.92            | 2.23             | 7.20             | 22.69            | 0.30            | 0.09            | 0.64           | 0.93             | 0.14             | 0.00             | 1.37             | 63.48           | 100.00 |
| Slice 2 piece BB | (Bentonite matrix) | 30       | 0.55            | 2.56             | 7.01             | 23.89            | 0.00            | 0.00            | 0.35           | 0.51             | 0.09             | 0.00             | 1.23             | 63.82           | 100.00 |
|                  |                    | 31       | 0.52            | 2.27             | 6.91             | 24.25            | 0.00            | 0.00            | 0.51           | 0.41             | 0.07             | 0.00             | 1.15             | 63.92           | 100.00 |
|                  |                    | 32       | 0.39            | 1.04             | 4.91             | 27.37            | 0.00            | 0.00            | 0.16           | 0.35             | 0.00             | 0.00             | 0.80             | 64.98           | 100.00 |
|                  |                    | 33       | 0.36            | 1.35             | 7.07             | 24.60            | 0.00            | 0.00            | 0.32           | 0.52             | 0.04             | 0.05             | 1.41             | 64.27           | 99.99  |
|                  |                    | 34       | 0.22            | 0.82             | 3.23             | 28.73            | 0.00            | 0.00            | 0.28           | 0.42             | 0.04             | 0.00             | 0.95             | 65.31           | 100.00 |
|                  |                    | 35       | 0.39            | 1.03             | 3.76             | 28.02            | 0.00            | 0.00            | 0.24           | 0.36             | 0.07             | 0.00             | 1.04             | 65.09           | 100.00 |
|                  |                    | 36       | 0.25            | 0.47             | 1.84             | 30.89            | 0.00            | 0.00            | 0.09           | 0.18             | 0.00             | 0.00             | 0.37             | 65.91           | 100.00 |
|                  |                    | 37       | 0.33            | 1.41             | 5.89             | 25.31            | 0.00            | 0.00            | 0.49           | 0.45             | 0.10             | 0.00             | 1.65             | 64.38           | 100.00 |
|                  |                    | 38       | 0.59            | 1.32             | 5.48             | 25.45            | 0.00            | 0.00            | 0.28           | 0.47             | 0.00             | 0.00             | 2.03             | 64.38           | 100.00 |
|                  |                    | 39       | 0.43            | 1.24             | 5.22             | 27.19            | 0.00            | 0.00            | 0.13           | 0.33             | 0.00             | 0.00             | 0.56             | 64.90           | 100.00 |
|                  |                    | 40       | 0.53            | 1.38             | 5.14             | 24.24            | 0.00            | 0.00            | 0.51           | 0.65             | 0.14             | 0.00             | 3.35             | 64.05           | 100.00 |

**Table S2:** EDXA analyses of bentonite gel and bentonite substrate (molar % ions).

## References

- [SKB (1983)] SKB. *Final Storage of Spent Nuclear Fuel—KBS-3*; Technical Report Art716-1; Svensk Kärnbränslehantering AB (SKB), Stockholm, Sweden, 1983.
- [Harrington and Tamayo-Mas (2016)] Harrington, J.F.; Tamayo-Mas, E. *Observational Evidence for the Differential Development of Porewater Pressure within Compact Bentonite and its Impact on Permeability and Swelling Pressure*; Technical Report CR-16-160; British Geological Survey: Nottingham, UK, 2016.
- [Harrington *et al.* (2017)] Harrington, J.F.; Daniels, K.A.; Tamayo-Mas, E. *Homogenisation on the Laboratory Scale: Development of Porewater Pressure and Stress in Bentonite*; Technical Report CR-17-142; British Geological Survey: Nottingham, UK, 2017.
