# Supplementary material
Source: MDPI journal article supplement (https://www.mdpi.com/2075-163X/11/2/215)

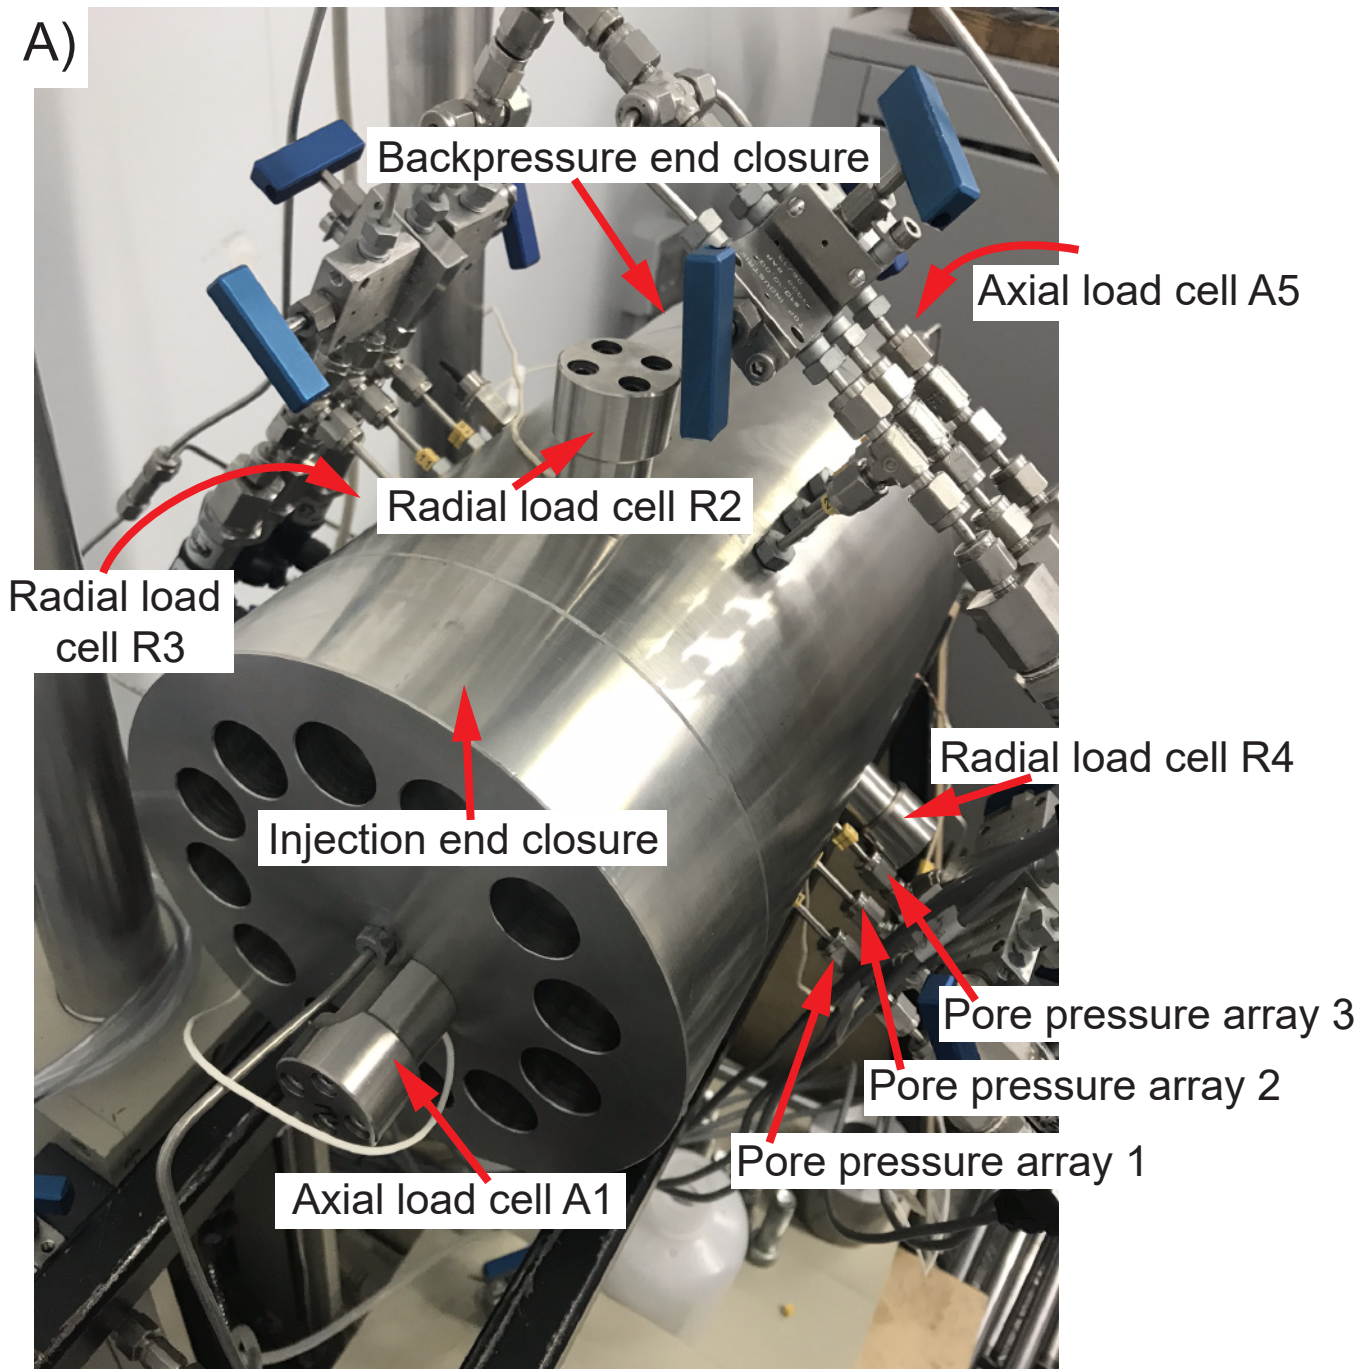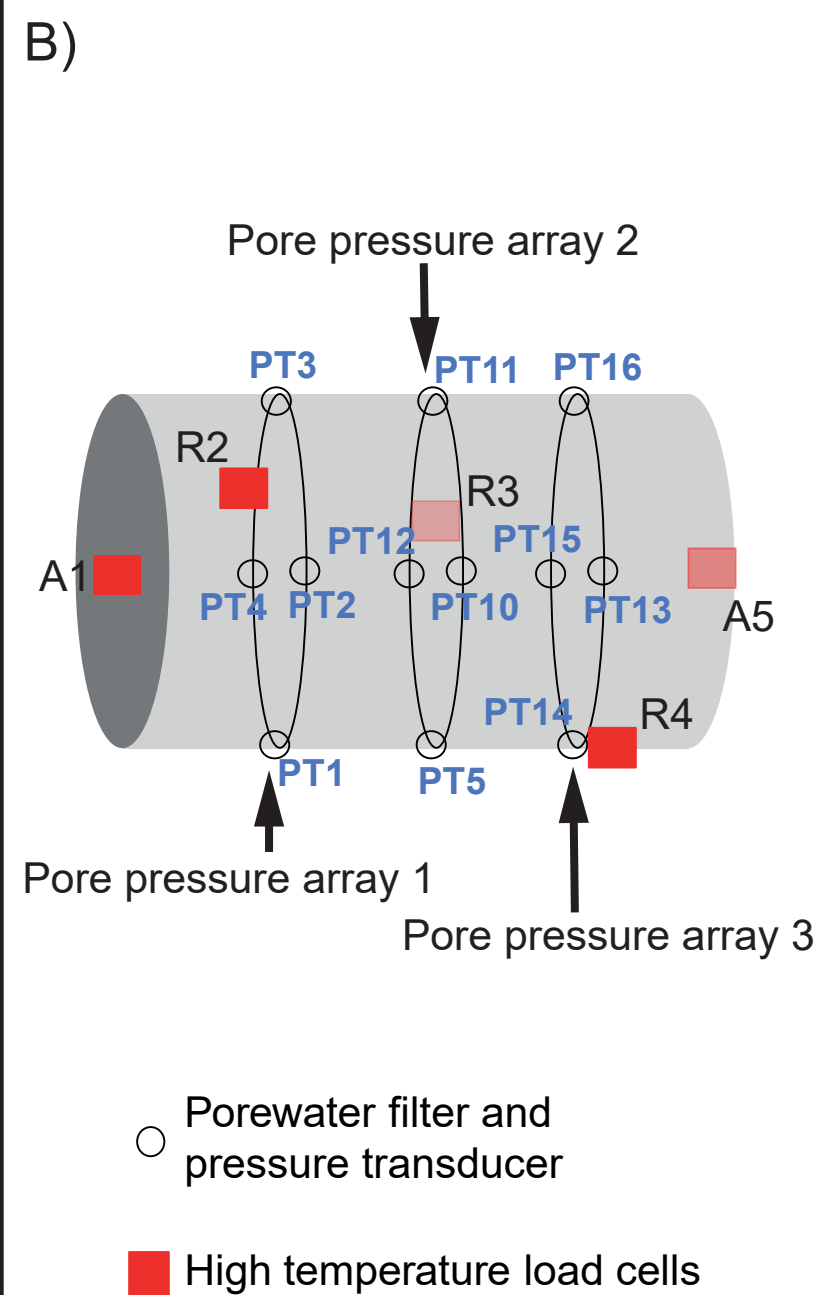

Supplement: s1 [file s1]
